# Supplementary material for: Initiating change locally in bullying and aggression through the school environment (INCLUSIVE): study protocol for a cluster randomised controlled trial
Source: Springer Nature journal article supplement (doi:10.1186/1745-6215-15-381), 2014-09-30
Supplement: 13063_2014_2256_MOESM1_ESM.pdf [file 13063_2014_2256_MOESM1_ESM.pdf]

40 schools recruited to the study

All students in Year 7 sent parental opt-out information sheets

Baseline survey data collected from students and teachers

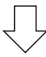

Randomisation of 40 schools to either intervention or control arm

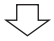

**Intervention**

Needs assessment from baseline survey fed back to schools at beginning of intervention year 1

Facilitated intervention delivered for two consecutive school years

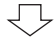

**Control**

Normal practice continues.

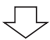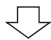

24 month survey conducted at end of intervention year 2

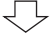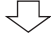

**Intervention**

Needs assessment from 24m survey fed back to schools at beginning of intervention year 3

Schools deliver unfacilitated intervention for 1 school year

**Control**

Normal practice continues.

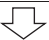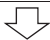

36 month survey conducted at end of intervention year 3
